# Supplementary material for: Predicting Safe Environment Behaviors to Prevent Nosocomial Infections Among Nursing Students: A Structural Equation Modeling Study
Source: Research Square preprint supplement (doi:10.21203/rs.3.rs-6902510/v1), 2025-07-14
Supplement: Supplementary file 1 [file bcc05f545c72be433c90401f.docx]

**KNOWLEDGE OF NOSOCOMIAL INFECTIONS INSTRUMENTS**

Student knowledge questionnaire on prevention of nosocomial infections / HAIs

Instructions: Choose the one of the following statements that you think is most correct.

1. Infections that occur in patients during the treatment process in hospitals or other health care facilities, where there is no infection or in the incubation period when admitted, and can appear after returning home, is the definition of:
2. Nosocomial Infection
3. Community Associated Infections (CAP)
4. Hospital Infections
5. Healthcare Associated Infections (HAIs)
6. Efforts to prevent the risk of contamination through body fluids, blood, secretions, non-intact skin, both in patients who are diagnosed, suspected of being infected or colonized, is the definition of:
7. Standard Precautions
8. Transmission Precautions
9. General Precautions
10. Public Awareness
11. One of the easiest standard precautions to implement and a pillar of IPC to prevent transmission of blood, blood products and body fluids is:
12. Hand Hygiene
13. Personal protective equipment
14. Environmental Hygiene
15. Decontamination of Tools
16. Standard Precautions is one of the PPI programs in hospitals. Included in Standard Precautions are:
17. Hand Hygiene, Communication Techniques, Equipment Decontamination, Staff Health, Linen Management
18. Hand Hygiene of PPE, Hygiene of Disposable Equipment, Cough Etiquette, Health of Officers, Linen Management
19. Hand Hygiene, PPE, Safe Injection, Health of Personnel, Environmental Hygiene, Decontamination of Equipment
20. Hand Hygiene, PPE, Aseptic Technique, Decontamination of Patient Disposable Equipment, Linen Management, Waste Management, Safe Injection & Prevent Sharps Injuries, Patient Placement, Environmental Hygiene, Cough Etiquette.
21. The correct statement regarding the use of PPE is
22. All PPE does not have to meet the standards of safety, protection and security of officers/patients.
23. Do not share the same PPE between two officers/individuals
24. Remove PPE after all procedures for all patients have been completed.
25. Hand hygiene is not necessary because gloves are already used.
26. The precautions applied to prevent and break the chain of disease transmission through contact, droplets and air are the meaning of:
27. Standard Precautions
28. Transmission Precautions
29. General Precautions
30. Public Awareness
31. The cleanliness of the environment of a room in a work unit is depicted in the 5 R's, namely Neat, Clean, Diligent, Concise, Maintain. What is meant by Clean is
32. The equipment is neatly arranged according to its function
33. Cleanliness of equipment and work areas
34. There are no items in the room that are not in use
35. Working environment with comfortable air
36. One of the efforts to provide standard precautions against infectious fluid spills , especially blood, in patient care rooms is by providing a spill kit. The following is not included in the contents of a spill kit :
37. Personal protective equipment
38. Absorbent cloth/rags
39. Sterile gauze
40. Disinfectant liquid
41. Proper waste management will protect officers from exposure to infectious waste. Which is a means for disposing of sharp waste after patient actions in the hospital are:
42. Used cardboard
43. Trash bin with yellow plastic bag
44. Safety box
45. Used infusion bottles
46. The stages of the critical equipment decontamination process are:
47. Initial Pre Cleaning – cleaning – High Level Disinfection (HLD)
48. Disinfection – cleaning – sterilization
49. Sterilization – cleaning – DTT
50. Initial Pre Cleaning – cleaning – sterilization
51. Hospital linen management must be correct to prevent officers from being contaminated with infectious fluids from stained linen. The correct behavior in handling dirty linen stained with hospital infectious fluids is:
52. Put dirty linen with infectious stains into the dirty linen trolley in a yellow plastic bag.
53. Put dirty linen with infectious stains into the dirty linen trolley in a black plastic bag.
54. Place dirty linen on the floor after removing it from the patient's bed mattress.
55. Dispose of soiled linen with infectious stains into the infectious waste bin.
56. The principle of safe injection is one needle, one medication, one patient. What is meant by one needle is:
57. One needle for multiple patients
58. One needle for multiple drugs
59. One needle for one type of drug and one patient
60. One needle for all types of drugs and one patient
61. Sterile handling of drugs, needles/syringes, vials, ampoules, patient medical devices, starting from storage, preparation to injection so that sterility remains guaranteed is called:
62. Septic Techniques
63. Aseptic Technique
64. Disinfection techniques
65. Sterile Technique
66. The stages in carrying out coughing or sneezing etiquette are:
67. Wash your hands – cover your mouth with tissue – wear a mask
68. Cover your mouth and nose with a tissue – wear a mask – wash your hands
69. Cover your mouth and nose with a tissue - throw the tissue in the trash - wash your hands - wear a mask
70. Wear a mask – throw it in the trash - wash your hands – cover your mouth and nose with a tissue
71. Phlebitis is a local inflammation in the peripheral vein insertion area which is a complication of intravenous therapy. Infection caused by infusion through peripheral veins is called:
72. CLABSI
73. VAP
74. CAUTI
75. PLABSI

**ATTITUDE QUESTIONNAIRE**

What do you think about the benefits of implementing safe environmental behavior in preventing nosocomial infections/HAIs? Please rate on a scale of 5 with 1 being strongly disagree and 5 being strongly agree.

**1-Strongly disagree ⎮2--- ⎮3--- ⎮4--- ⎮5-Strongly agree**

| **No** | **Statement** | **1** | **2** | **3** | **4** | **5** |
| --- | --- | --- | --- | --- | --- | --- |
| 1 | I believe that implementing a safe environment (safety environment behavior) in preventing nosocomial infections/HAIs will make the room cleaner and more beautiful. |  |  |  |  |  |
| 2 | I believe that implementing safe environment behavior in preventing nosocomial infections/HAIs will reduce the transfer of infection. |  |  |  |  |  |
| 3 | I believe that implementing a safe environment (safety environment behavior) in preventing nosocomial infections/HAIs will make the Treatment Room safer. |  |  |  |  |  |
| 4 | I believe that implementing a safe environment (safety environment behavior) in preventing nosocomial infections/HAIs will reduce anxiety at work. |  |  |  |  |  |
| 5 | I believe that implementing a safe environment (safety environment behavior) in preventing nosocomial infections/HAIs will make health workers more careful in their work. |  |  |  |  |  |
| 6 | Implementing a safe environment (safety environment behavior) in preventing nosocomial infections/HAIs will take more time at work. |  |  |  |  |  |
| 7 | Implementing a safe environment (safety environment behavior) in preventing nosocomial infections/HAIs will cost more funds in the work. |  |  |  |  |  |
| 8 | Implementing a safe environment (safety environment behavior) in preventing nosocomial infections/HAIs will require more competent personnel. |  |  |  |  |  |
| 9 | Implementing a safe environment (safety environment behavior) in preventing nosocomial infections/HAIs makes work feel more complex because it requires the use of PPE. |  |  |  |  |  |

**SUBJECTIVE NORM QUESTIONNAIRE**

How likely is it that your decisions about safe environmental behavior *in* preventing nosocomial infections/HAIs are influenced by the following people, please rate on a 5-point scale with 1 being very likely and 5 being extremely likely.

**1-Very unlikely ⎮2--- ⎮3--- ⎮4--- ⎮5-Very likely**

| **No** | **Statement** | **1** | **2** | **3** | **4** | **5** |
| --- | --- | --- | --- | --- | --- | --- |
| 1 | Room Nurse |  |  |  |  |  |
| 2 | Peers (fellow students). |  |  |  |  |  |
| 3 | Patient's family |  |  |  |  |  |
| 4 | Nutritionists |  |  |  |  |  |
| 5 | PPI Nurse |  |  |  |  |  |
| 6 | Clinical Preceptor |  |  |  |  |  |
| 7 | Visitors |  |  |  |  |  |
| 8 | Doctor in charge of the room |  |  |  |  |  |

**PERCEIVED BEHAVIORAL CONTROL (PBC) QUESTIONNAIRE**

The following statements are factors that have been identified by nursing professional students that are perceived as supporting and inhibiting factors for students in implementing safe environmental management (safety environment behavior) in preventing nosocomial infections/HAIs.

Please indicate the extent to which you agree that the following statements are difficult to implement. Please rate on a 5-point scale with 1 being strongly disagree and 5 being strongly agree.

**1-Strongly disagree ⎮2--- ⎮3--- ⎮4--- ⎮5-Strongly agree.**

| No | Statement | 1 | 2 | 3 | 4 | 5 |
| --- | --- | --- | --- | --- | --- | --- |
|  | **SUPPORTING FACTORS** |  |  |  |  |  |
| 1 | There are trash bins in every corner of the hospital. |  |  |  |  |  |
| 2 | There are changing facilities in each room (changing room) |  |  |  |  |  |
| 3 | There are adequate facilities in each patient room, such as a sink and soap for hand hygiene. |  |  |  |  |  |
| 4 | There is direction from the hospital PPI team and the head of the room |  |  |  |  |  |
| 5 | There is monitoring in waste sorting and the use of sharp objects. |  |  |  |  |  |
| 6 | There is special learning about the management of nosocomial infections. |  |  |  |  |  |
|  | **INHIBITING FACTORS** |  |  |  |  |  |
| 7 | Limited funds to improve infection control facilities. |  |  |  |  |  |
| 8 | Supervision of the implementation of infection prevention is still not optimal |  |  |  |  |  |
| 9 | Minimal motivation from the hospital |  |  |  |  |  |
| 10 | Limited PPE equipment owned by students |  |  |  |  |  |

**INTENTION QUESTIONNAIRE**

How big is the desire you to implement the implementation of safe environmental management (safety environment Behavior) in preventing nosocomial infections. Please rate on a 5-point scale with 1 being very unwilling and 5 being very willing.

**1-Very unwilling ⎮2--- ⎮3--- ⎮4--- ⎮5-Very willing**

| No | Statement | 1 | 2 | 3 | 4 | 5 |
| --- | --- | --- | --- | --- | --- | --- |
| 1 | I clean my hands with soap/handrub before contact with the patient |  |  |  |  |  |
| 2 | I clean my hands with soap/handrub after contact with the patient |  |  |  |  |  |
| 3 | I use personal protective equipment when performing interventions according to SOP |  |  |  |  |  |
| 4 | After performing vein insertion, I immediately dispose of the IV catheter needle into the Safety Box |  |  |  |  |  |
| 5 | I use gloves when performing direct injections on patients |  |  |  |  |  |
| 6 | I disinfect the area to be punctured from the inside out |  |  |  |  |  |
| 7 | I use transparent dressing to cover the puncture area |  |  |  |  |  |
| 8 | I ensure that the IV fluid drips smoothly according to procedure before leaving the patient |  |  |  |  |  |
| 9 | I change the IV dressing if it looks dirty or there is fluid seepage on the dressing |  |  |  |  |  |
| 10 | I change the IV fluid without touching the sterile area |  |  |  |  |  |
| 11 | I use sterile gloves when installing the urinary catheter |  |  |  |  |  |
| 12 | When installing the urinary catheter, I use sterile anesthetic-lubricant jelly "single use" |  |  |  |  |  |
| 13 | I apply aseptic measures using alcohol swabs when performing direct/indirect injections |  |  |  |  |  |
| 14 | I observe any swelling, redness or excessive pain in the IV Canula insertion area |  |  |  |  |  |
| 15 | I dispose of gauze contaminated with patient blood into an infectious waste bin (yellow plastic bag) |  |  |  |  |  |
| 16 | I wash my hands with soap and running water after performing contaminated actions and body fluids after removing gloves |  |  |  |  |  |
| 17 | I dispose of sharp waste into the safety box |  |  |  |  |  |
| 18 | When coughing/sneezing, I cover my mouth and nose with disposable tissue |  |  |  |  |  |
| 19 | I change into other clean clothes after leaving the hospital |  |  |  |  |  |
| 20 | I immediately empty the full urine bag using a urinal container which is then disposed of in the toilet. |  |  |  |  |  |
| 21 | I re-sheath the used syringe |  |  |  |  |  |
| 22 | After performing suction on the patient, I soak the suction catheter in a sterile com in preparation for the next use |  |  |  |  |  |
| 23 | I wear gloves every time I meet a patient |  |  |  |  |  |
| 24 | I wear the same gloves when measuring vital signs on several patients in one room |  |  |  |  |  |
| 25 | I place the urine bag on the patient's bed/thigh when moving the patient/making the bed |  |  |  |  |  |
